# Supplementary material
Source: publisher figshare collection journal article supplement (https://acs.figshare.com/ndownloader/files/4710424)
Supplement: Supplementary file 1 [file 4710424]

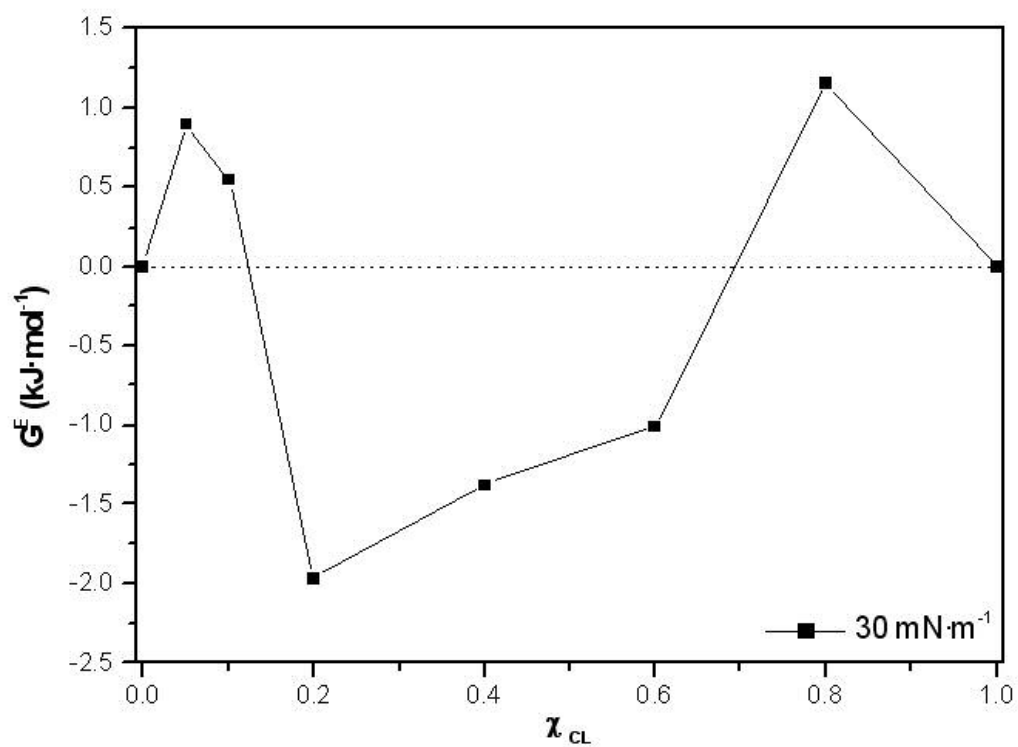

**FIGURE 1.** Excess area per molecule as a function of composition for pure and mixed POPE:CL monolayers at  $30 \text{ mN} \cdot \text{m}^{-1}$ .

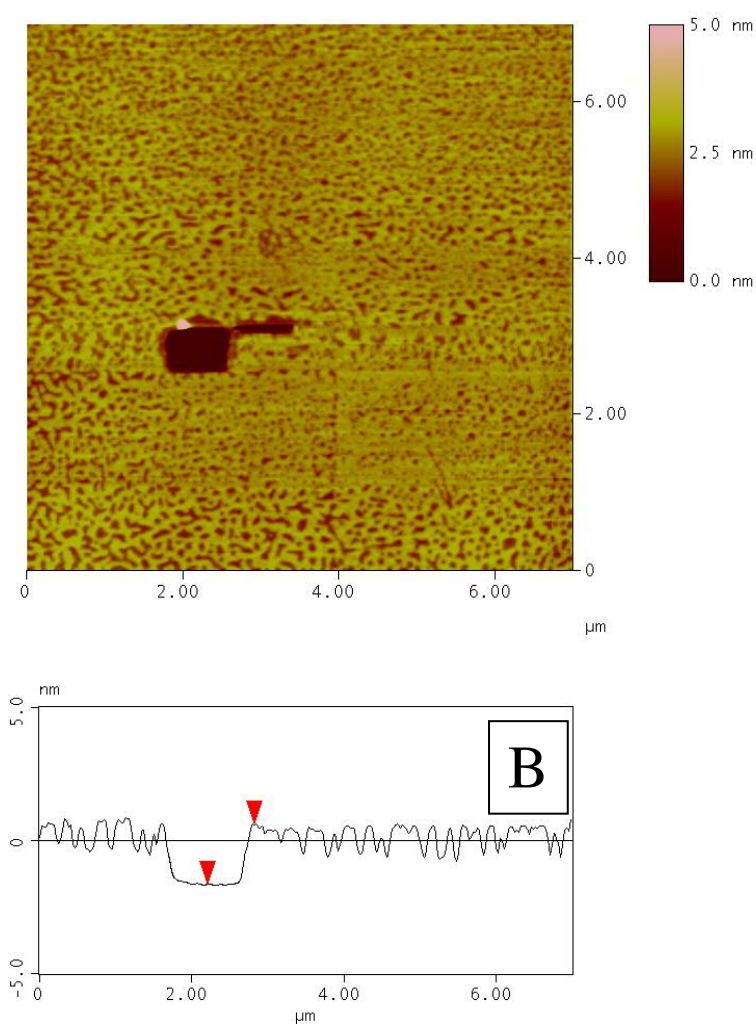

**FIGURE 2.** In this example, the POPE:CL monolayer transferred at  $30 \text{ mN}\cdot\text{m}^{-1}$  that we are showing in Figure 3E has been scratched in a small area (A) in order to evaluate its thickness, The height profile analysis (B) allows to establish the step height between the monolayer and the uncovered substrate ( $1.4 \pm 0.2 \text{ nm}$ ).
